# Supplementary material
Source: PubMed Central journal article supplement (PMC4685836)

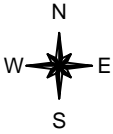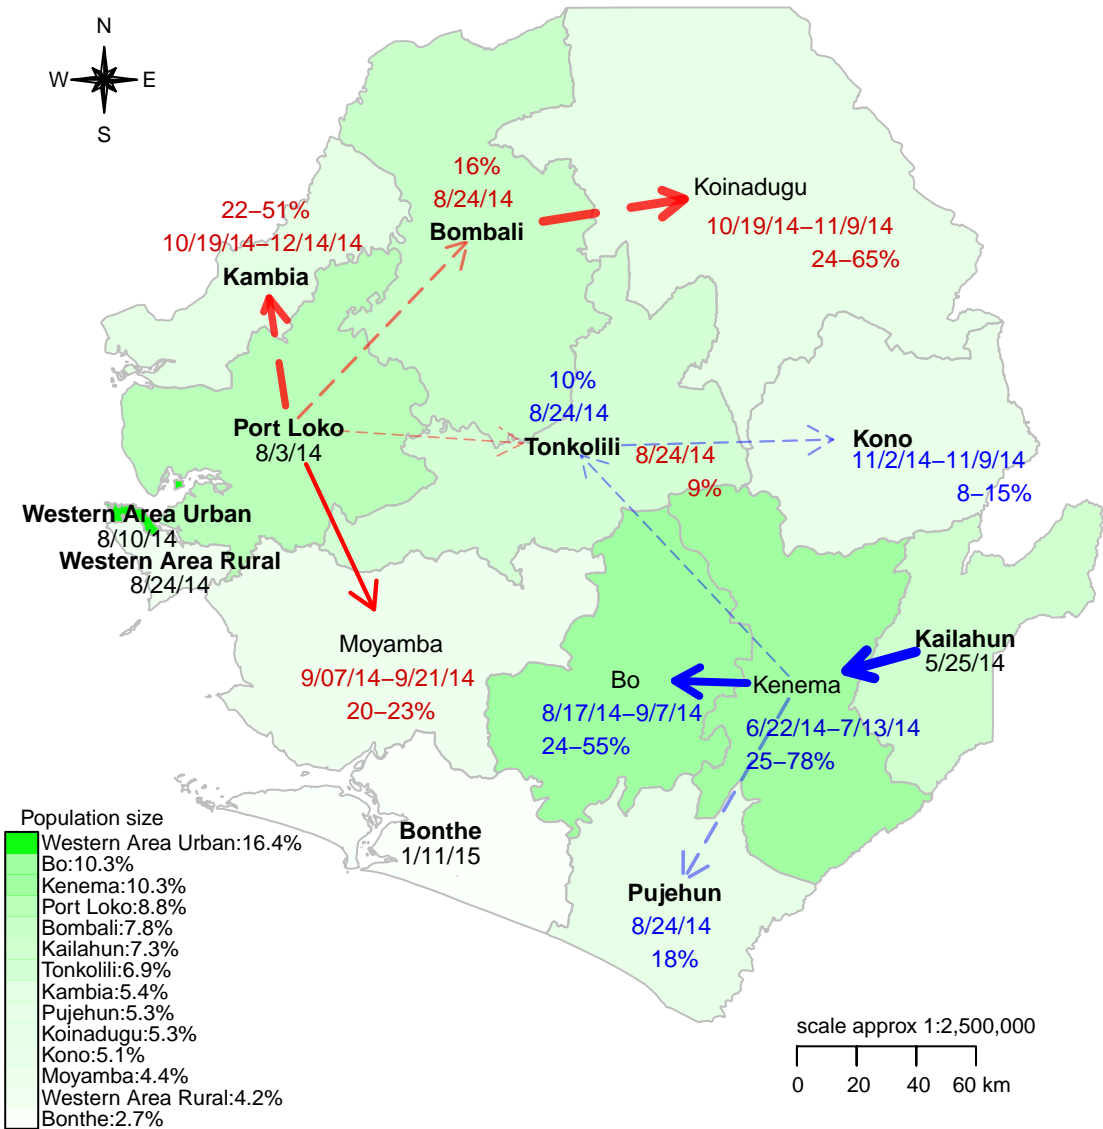

Supplement: rsif20150536supp10.pdf [file rsif20150536supp10.pdf]

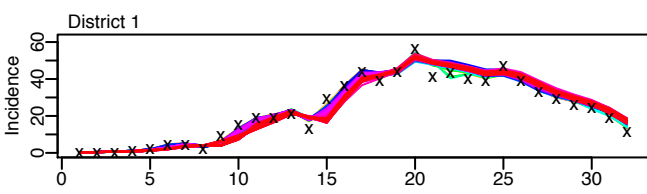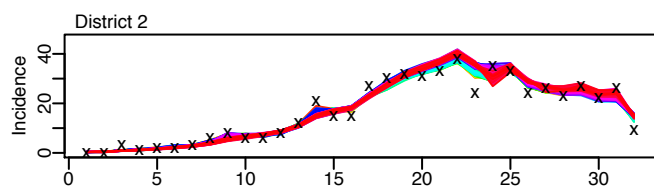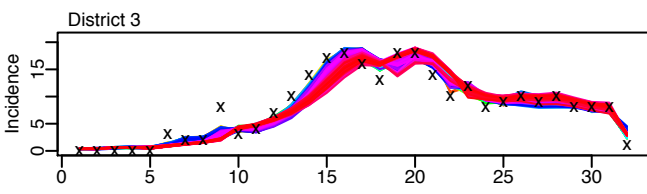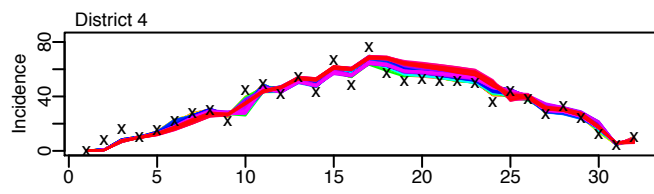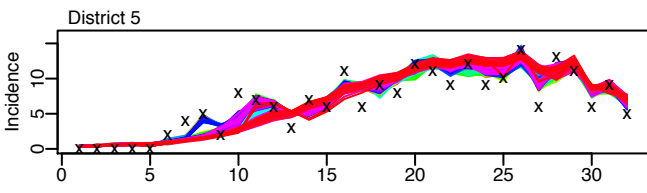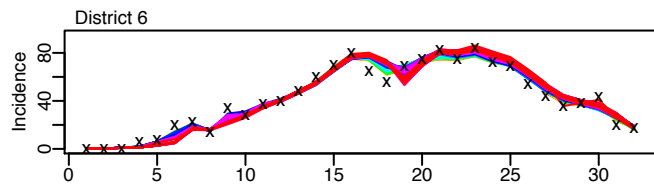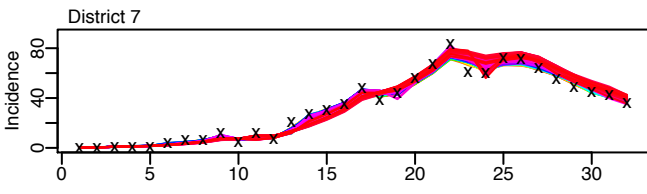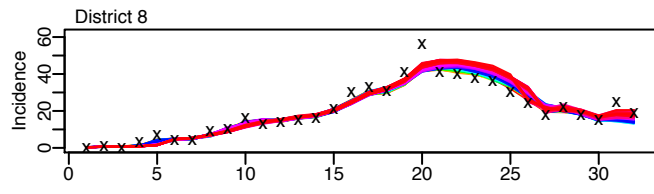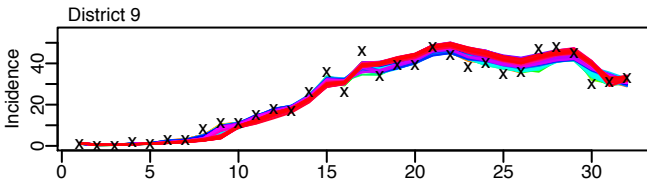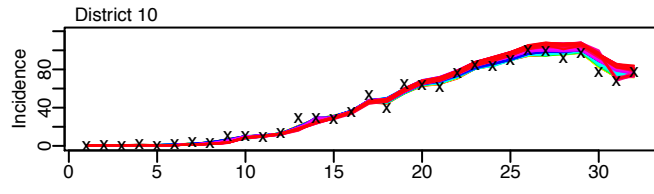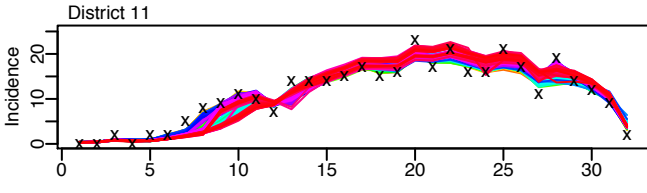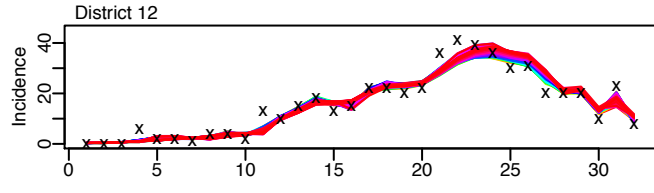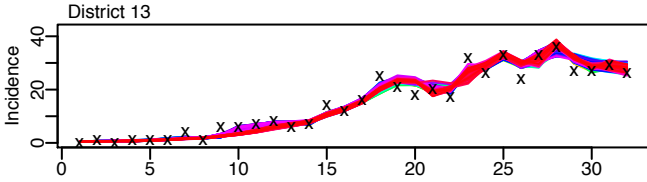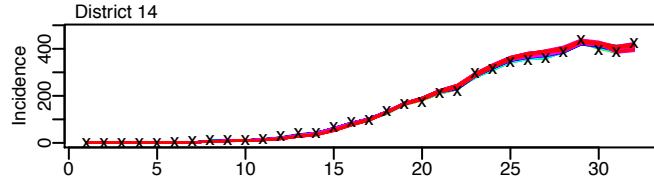

Supplement: rsif20150536supp2.pdf [file rsif20150536supp2.pdf]

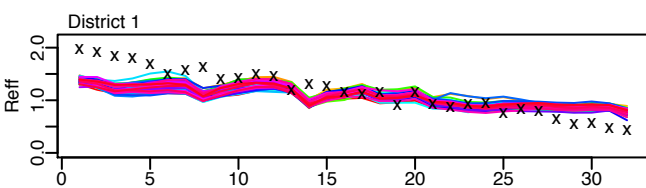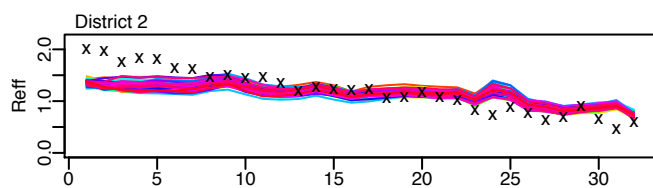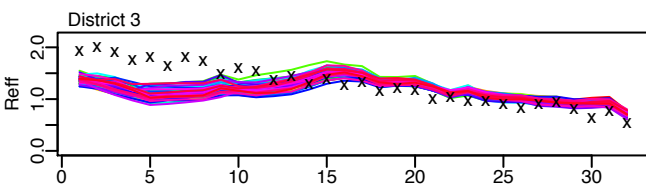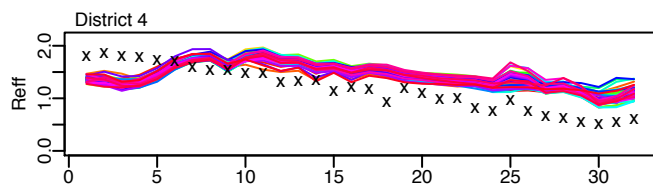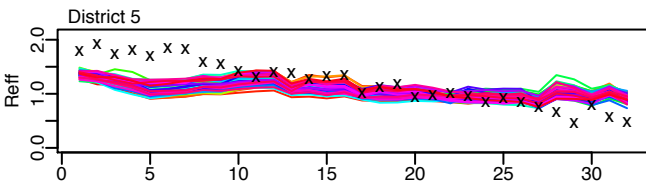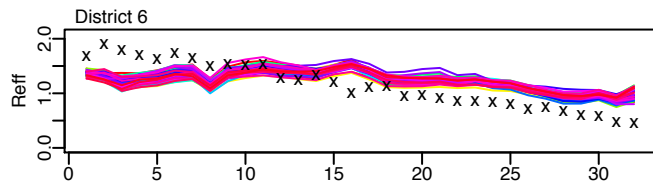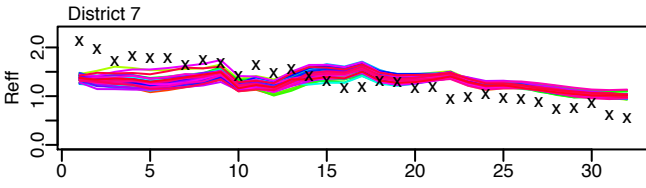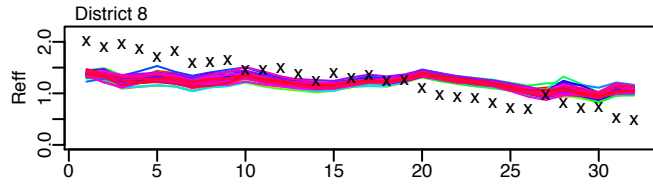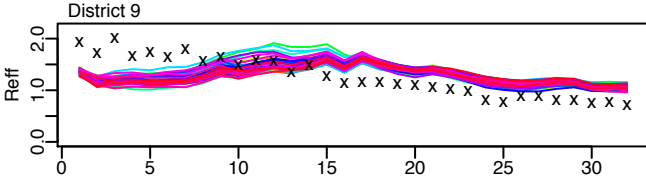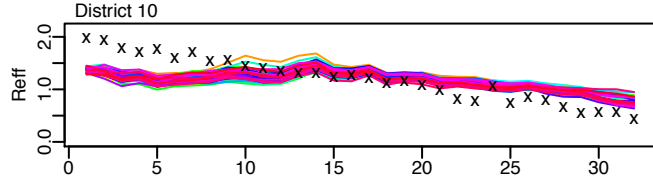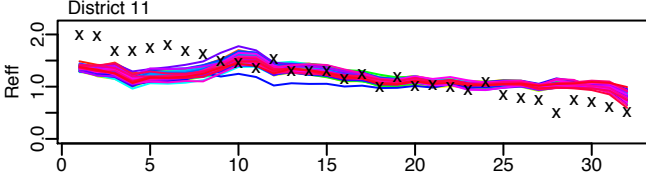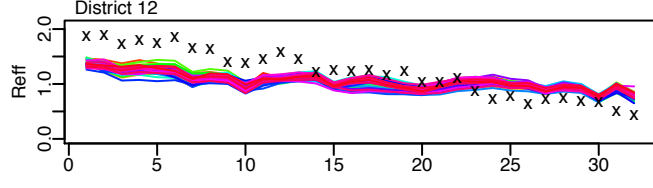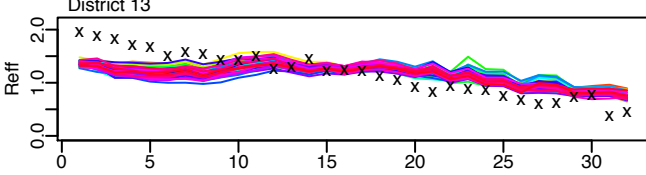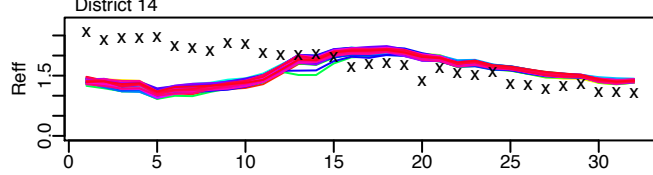

Supplement: rsif20150536supp3.pdf [file rsif20150536supp3.pdf]

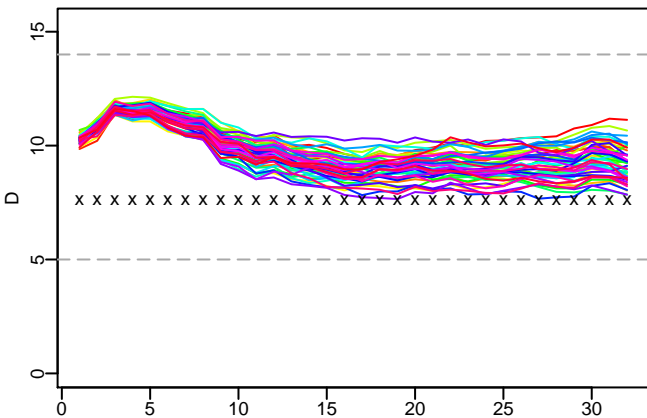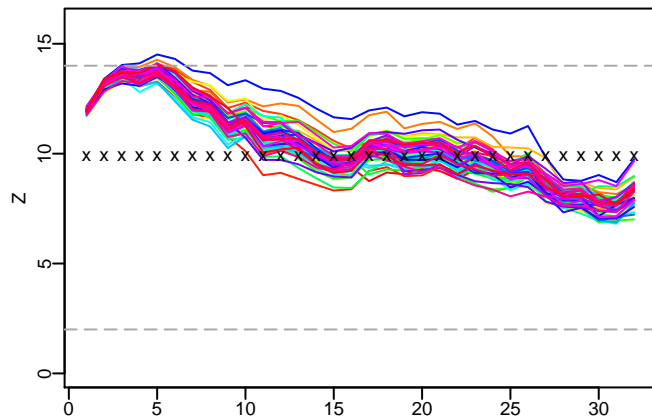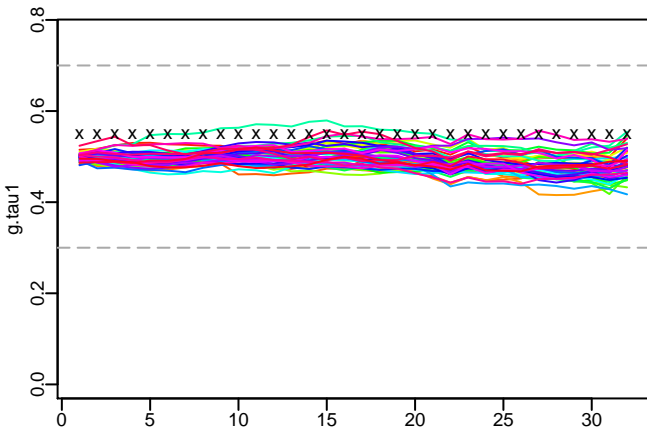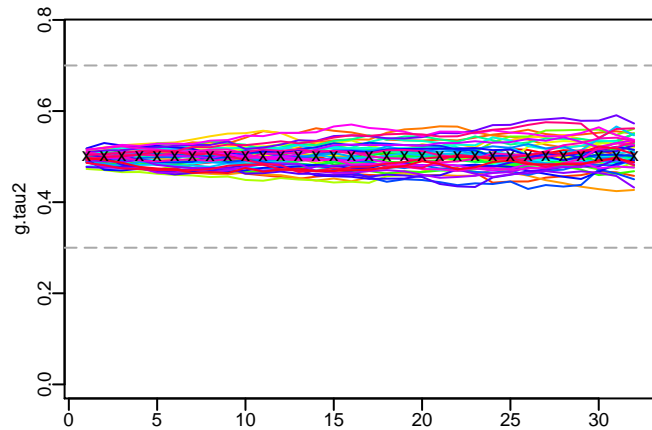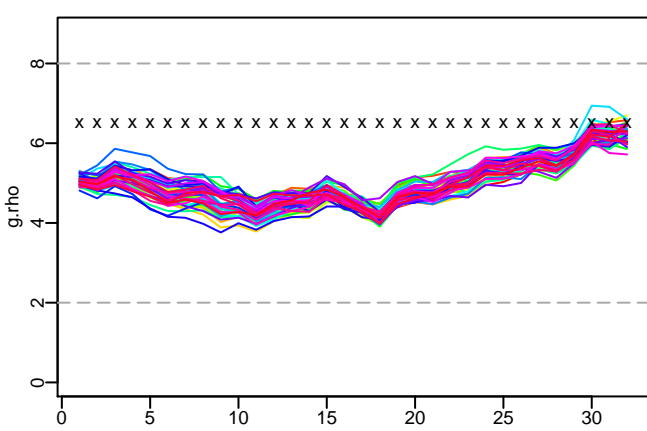

Supplement: rsif20150536supp4.pdf [file rsif20150536supp4.pdf]

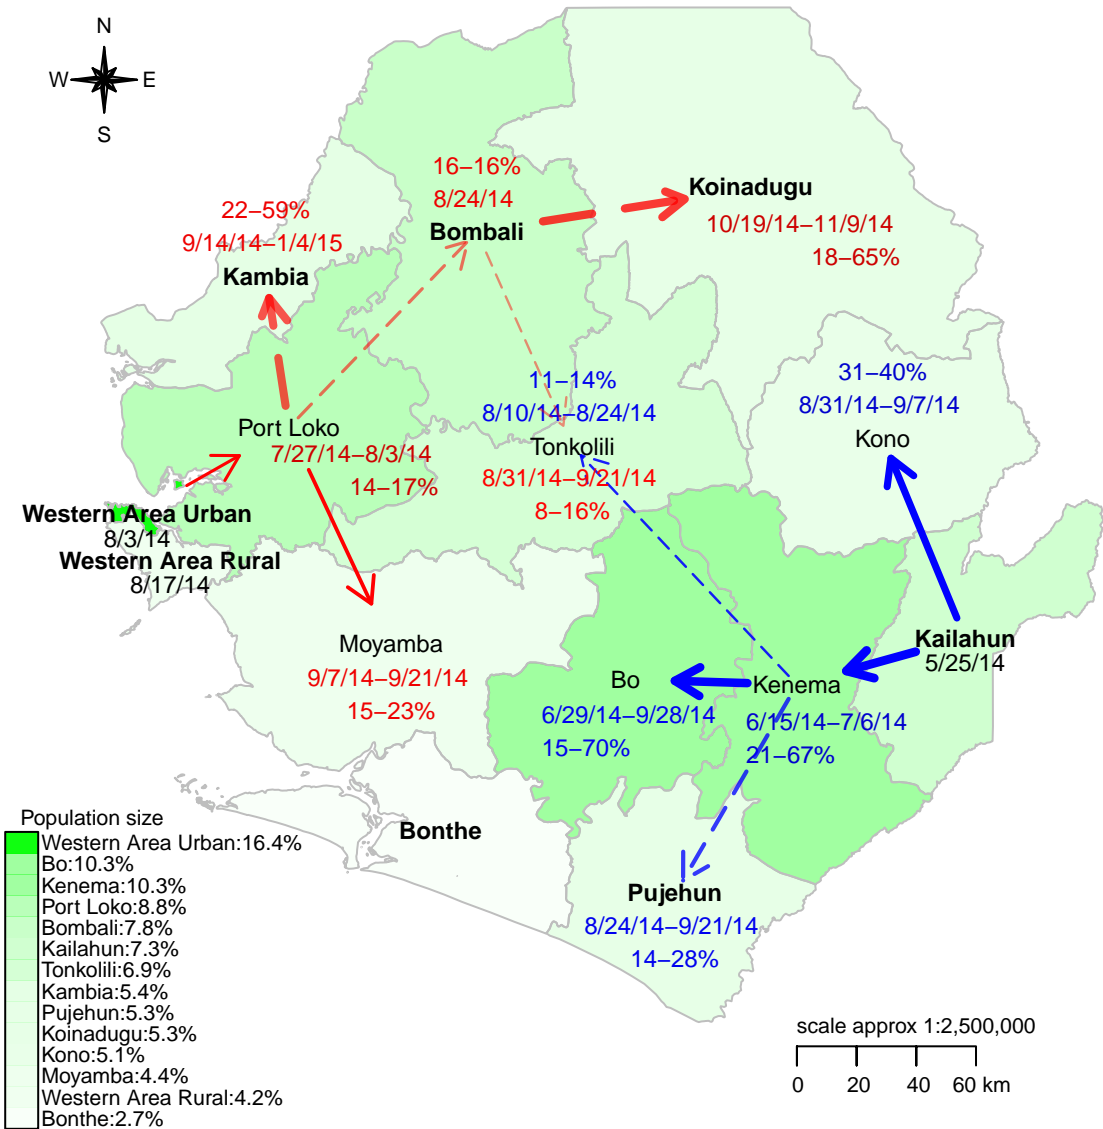

Supplement: rsif20150536supp5.pdf [file rsif20150536supp5.pdf]

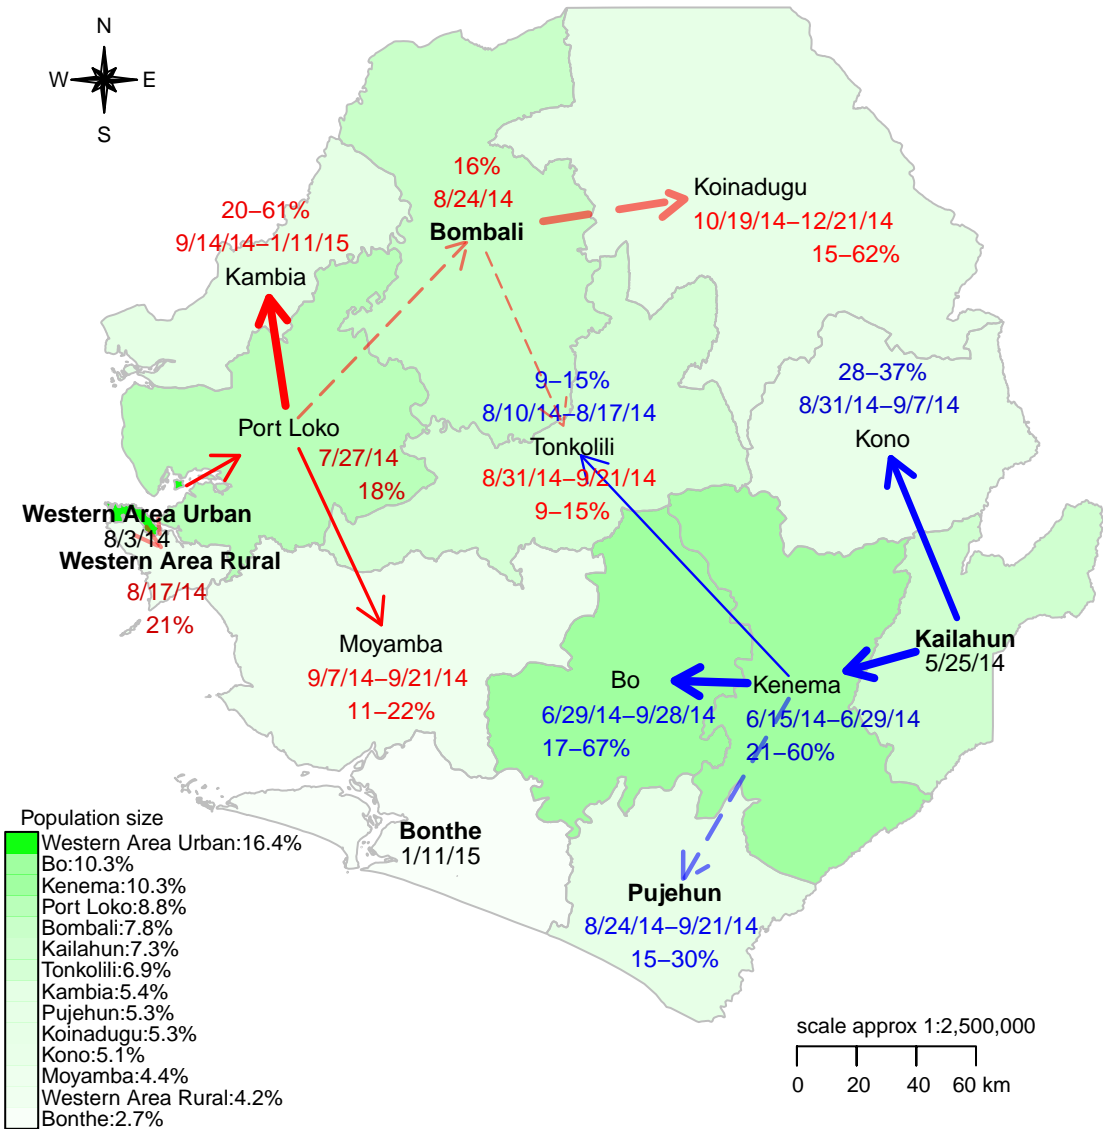

Supplement: rsif20150536supp6.pdf [file rsif20150536supp6.pdf]

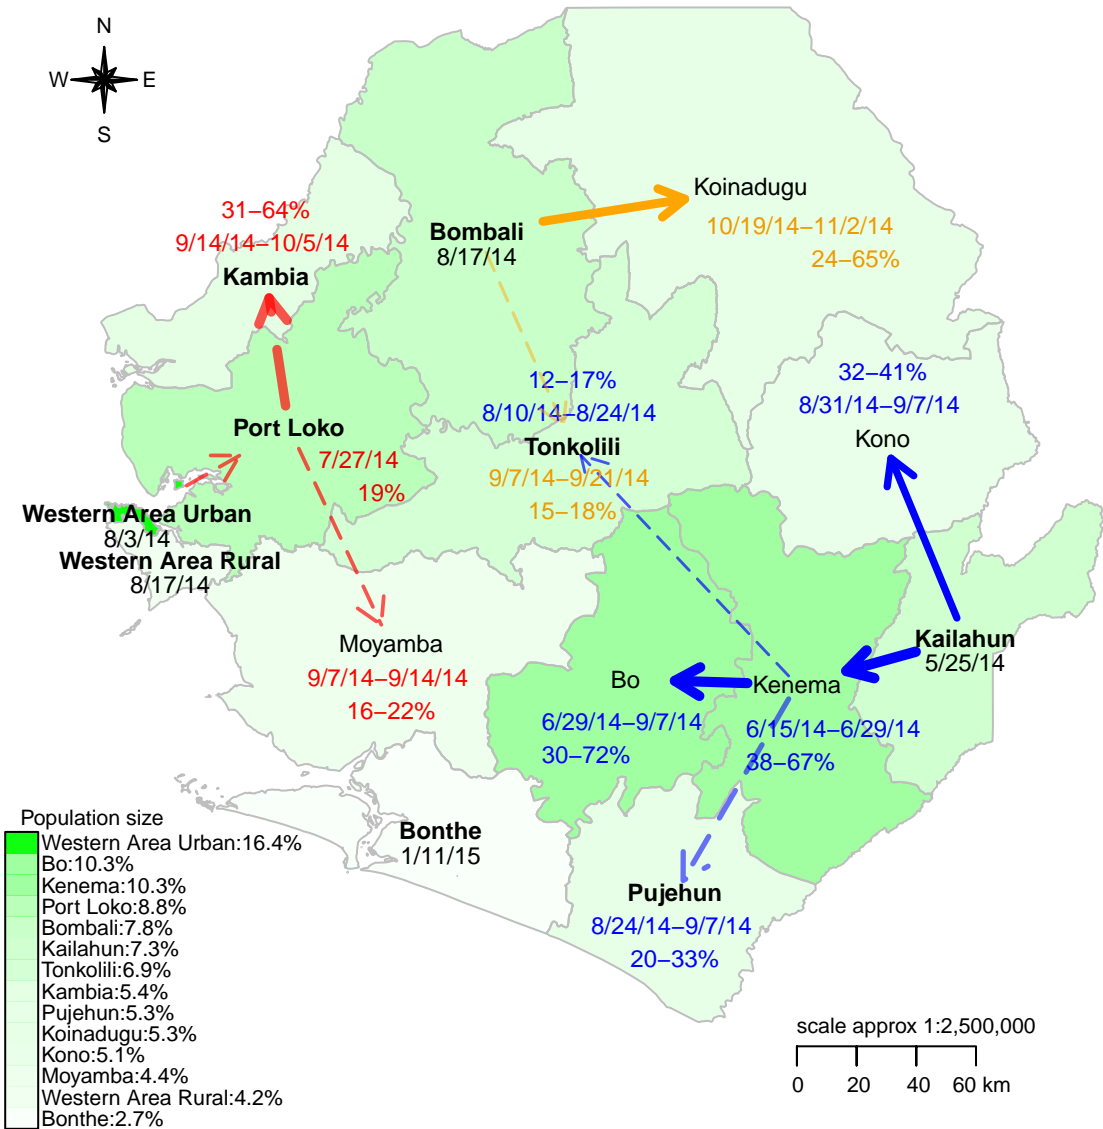

Supplement: rsif20150536supp7.pdf [file rsif20150536supp7.pdf]

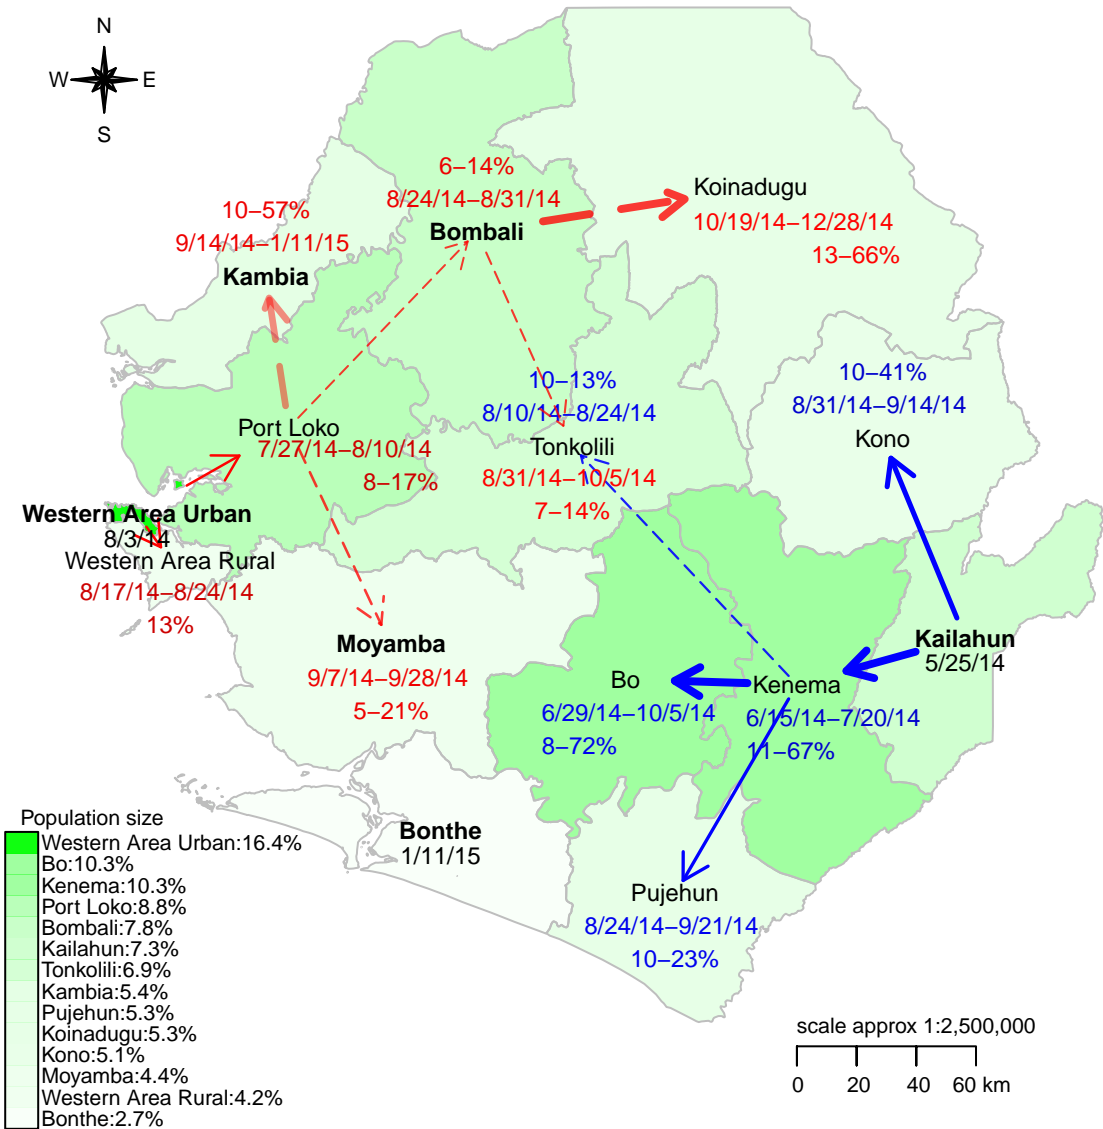

Supplement: rsif20150536supp8.pdf [file rsif20150536supp8.pdf]

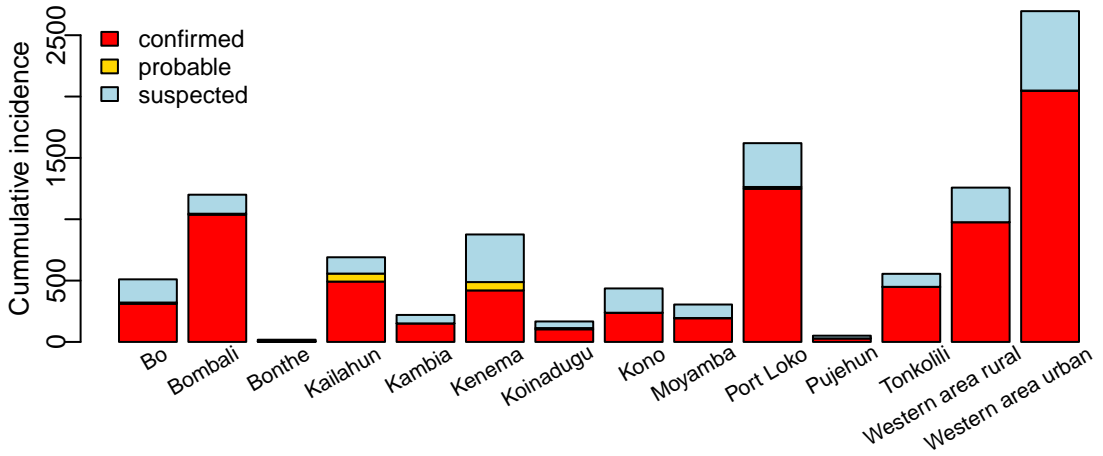

Supplement: rsif20150536supp9.pdf [file rsif20150536supp9.pdf]
